# Supplementary material
Source: Elsevier journal article supplement (https://www.sciencedirect.com/science/article/pii/S1888441521000126)
Supplement: mmc1 [file S1888441521000126:mmc1.doc]

**Anexo 1: Aspectos a considerar para un cuidado integral del paciente con fractura de cadera**

|  | **Consideraciones / Riesgos** | **Medidas a adoptar** |
| --- | --- | --- |
| **Anemia perioperatoria** | Etiología mixta | Controles diarios Hierro IV carboximaltosa. (500-1000 mg) en caso de Hb 9 - 13 g.dL-1 |
| **Transfusión** | Criterios restrictivos (Hb de 8g.dL-1) carecen de diferencias significativas en morbimortalidad. | Fundamentada en la clínica, comorbilidades, y niveles de Hb. Administración de una en una, y reevalución. |
| **Antiagregación y anticoagulación** | Aumentan el sangrado quirúrgico, contraindican anestesia neuroaxial | Pautas de sustitución definidas, estratificando el riego hemorrágico y el trombótico. |
| **Trombosis** | Trombosis venosa profunda y tromboembolismo pulmonar | Medidas mecánicas y/o farmacológicas (HBPM, aumenta algo el riesgo de sangrado). |
| **Control de la glucemia** | Factor importante en la reducción de la morbilidad. | Objetivo: glucemias entre 60 - 180 mg.dL-1, con pautas de insulina |
| **Control hidroelectrolítico** | Deshidratación o sobrecarga de líquidos, y alteraciones electrolíticas | Niveles de Na+ entre 120 – 150 meq.dL-1 y de K+ entre 2,8 - 6 meq.dL-1. |
| **Función renal** | Valores de creatinina falsamente normales por atrofia muscular | Valorar la tasa de filtrado glomerular |
| **Nutrición** | Albumina < 3,5 g.dL-1 indica mayor mortalidad perioperatoria. | Suplementos nutricionales hiperproteicos |
| **Estado hemodinámico** | Cuantificable mediante el Índice de Goldman. No precisan evaluación especializada soplos y arritmias sin inestabilidad hemodinámica. | Fibrilación auricular: se recomienda un ritmo ventricular < a 100 lpm, corrigiendo los factores causales y si no es suficiente, administrando betabloqueantes o el verapamilo de elección. |
| **Infección respiratoria** | Riesgo por encamamiento prolongado y patologías coexistentes. | Profilaxis antibiótica y fisioterapia respiratoria. La anestesia subaracnoidea, movilización precoz y analgesia fisioterapia. |
| **Oxigenoterapia** | Hay episodios de hipoxia desde el momento del ingreso hasta el quinto día del postoperatorio. | SpO2 > 92% e idealmente > 95%. Oxigeno suplementario a 2-3 lpm desde el ingreso hasta al menos las 48 horas de postoperatorio |
| **Analgesia perioperatoria** | Reduce la morbilidad respiratoria, cardiovascular, gastrointestinal, riesgo delirio y estancia hospitalaria, y facilita movilización precoz. | Infraestimada, especialmente en desorientados o con demencia. Debe ser multimodal, evitando opiáceos y exceso de AINEs. El uso de bloqueos nerviosos periféricos es deseable. |
| **Sondaje vesical** | Tanto la retención urinaria como el sondaje favorecen la infección urinaria. | Evitar el sondaje sistemático (usar sondaje evacuador intermitente, en caso de retención). Si se sonda en la cirugía, promover su retirada a las 24 horas, tras iniciar la movilización. |
| **Intraoperatorio** | Las complicaciones, estancia hospitalaria y mortalidad se reducen cuando aumenta la experiencia del equipo quirúrgico y anestésico. | Hay que realizar correctamente la profilaxis antibiótica, 30-60 minutos antes de la cirugía. Se recomienda la anestesia subaracnoidea siempre que las condiciones lo permitan. |
| **Delirio** | Incidencia 60%, especialmente si hay condicionantes previos. Detectar a los pacientes de riesgo. | Pautar medidas preventivas y tratamiento precoz (haloperidol (0,25-0,5 mg.6h-1), olanzapina (2,5 mg.24 h-1.SC o VO) o risperidona (0,25 - 0,5mg VO), evitando la contención mecánica. |
| **Movilización precoz** | Reduce úlceras por decúbito, las complicaciones respiratorias, y el riesgo de TVP | Movilización temprana al día siguiente de la intervención, si es posible |
| **Profilaxis secundaria** | Existe un riesgoelevado de fractura contralateral2. | Tratamiento al alta hospitalaria calcio con vitamina D, salvo contraindicación. |

**Tabla 1: Características demográficas:**

| **Grupo** |  | **PRE** | **IMPL** | **POST** |
| --- | --- | --- | --- | --- |
| **Edad** |  | 86,8±5.9 | 84,8±6,8 | 85,1±7,1 |
| **Sexo** | Mujer | 75% | 63,4% | 77,9% |
| Hombre | 25% | 36,6% | 22,1% |
| **ASA** | I | 0% | 0% | 0% |
| II | 5,3% | 10,7% | 9,0% |
| III | 93,7% | 83,9% | 85,2% |
| IV | 0,9 | 4,4% | 4,5% |
| **Tipo de fractura** | Extracapsular | 100% | 48,2% | 37,3% |
| Intracapsular | 0% | 51,8% | 62,7% |
| **Técnica anestésica** | General | 9.52% | 18.02% | 8.82% |
| Subaracnoidea | 90.48% | 81.98% | 87.75% |
| Bloqueos | 0% | 0% | 3.43% |
| **Consumo fármacos que alteran la hemostasia** | AAS 100 | 31,82% | 27,68% | 27,45% |
| AAS 300 | 5,88% | 1,79% | 0,49% |
| Clopidogrel | 4,55% | 3,57% | 6,37% |
| Acenocumarol | 20,45% | 21,43% | 12,75% |
| NACOS | 1,14% | 1,79% | 2,45% |

Sin diferencias estadísticamente significativas entre los grupos en edad, sexo o grado ASA.

Nota: En el PRE todas las fracturas fueron extracapsulares, debido al código utilizado para localizar las historias clínicas (esta parte del estudio se realizó retrospectivamente).

Sin diferencias estadísticamente significativas entre los grupos en la distribución o en el porcentaje de los fármacos antiagregantes (p=0,165) o anticoagulantes (p=0,318) consumidos.

NACOS: nuevos anticoagulantes orales

**Tabla 2: Anemia perioperatoria**

|  | **PRE** | **IMPL** | **POST** |
| --- | --- | --- | --- |
| **Hemoglobina al ingreso *** | 12,1±1,6 | 12,5±1,8 | 12,5±1,7 |
| **Hemoglobina a las 24h *** | 10,3±1,7 | 11,7± | 11,2± |
| **Hemoglobina a las 48h *** | 9,8±1,4 | 11,2± | 10,6± |
| **Hemoglobina postquirúrgica** | 9,0±1,4 | 10,0±1,7 | 9,6±1,7 |
| **Hemoglobina al alta** | 10,3±1,1 | 10,2±1,2 | 10,1±1,2 |
| **Anemia al ingreso** | 49% | 61% | 62% |
| **Anemia al alta** | 97,73% | 88,99% | 94,12% |

***** p<0,001

**Tabla 3: Terapia transfusional**

|  | | **PRE** | **IMPL** | **POST** |
| --- | --- | --- | --- | --- |
| **Total pacientes trasfundidos *** | | 68,97% | 44,55% | 49,51% |
| **Nº concentrados de hematíes trasfundidos **** | **1** | 6,67% | 26,53% | 29,70% |
| **2** | 66,67% | 59,18% | 48,51% |
| **3** | 15% | 2,04% | 11,88% |
| **4** | 10% | 12,24% | 7,92% |
| **Umbral transfusional ***** | **< 7 g /dl Hb** | 6,67% | 0% | 14.14% |
| **≥7-8 g / dl Hb** | 38,33% | 50% | 5,57% |
| **≥8 -9g/ dl Hb** | 53,33% | 50% | 29,29% |
| **Momento de la transfusión ****** | **Previo a cirugía** | 20% | 10,20% | 3.96% |
| **Intraoperatorio** | 1% | 2% | 1,98% |
| **Postquirúrgico** | 55% | 73,47% | 81,19% |

*p = 0,002 entre IMPL y POST respecto al PRE.

** p=0.041 entre el POST y el PRE en el número de pacientes a los que se les transfunde sólo un concentrado de hematíes respecto a quienes se les transfunden dos o más.

*** p = 0.004 entre PRE y IMPL respecto al POST.

************ p= 0.006. En el grupo PRE existe una alta tasa de transfusión preoperatoria.

**Tabla 4: Datos de gestión relativos a la cirugía de fractura de cadera:**

| **Grupo** |  | **PRE** | **IMPL** | **POST** |
| --- | --- | --- | --- | --- |
| **Intervención quirúrgica *** | Antes de 48 horas | 8,43% | 17,12% | 39,22% |
| Después de 48 horas | 91,57% | 82,88% | 60,78% |
| **Procedencia** | Domicilio | 48,9% | 50,9% | 50,5% |
| Residencia | 51,1% | 49,1% | 49,5% |
| **Destino** | Domicilio a Domicilio | 25,30% | 24,53% | 30,10% |
| Domicilio a Residencia | 21,69% | 26,42% | 21,43% |
| Residencia a Residencia | 53,01% | 49,06% | 48,47% |
| **Días ingreso según destino (P25-P50-P75)** | Domicilio a Domicilio | 9-11-13 | 8-10-13 | 7-9-11 |
| Domicilio a Residencia | 8-10-13 | 11-14-16 | 11-14-18 |
| Residencia a Residencia | 9-11-12 | 8-9-11 | 6-7-9 |
| **Mortalidad** | Intrahospitalaria | 6,82% | 3,57% | 3,43% |
| A las 6 semanas | 14.77% | 6.25% | 4.41% |
| A los 3 meses | 17.05% | 6.25% | 7.84% |
| A los 6 meses | 18.18% | 9.82% | 11.27% |
| **Reingreso** | En los 3 primeros meses | 23,17% | 17,59% | 6,70% |

* p = 0.001 entre PRE e IMPL y POST.

P25-P50-P75 son los percentiles 25, 50 y 75 respectivamente.
